# Supplementary material for: Non-catalytic oxidative depolymerization of lignin in perfluorodecalin to produce phenolic monomers
Source: Royal Society of Chemistry journal article supplement (doi:10.1039/d0gc02505d), 2020-01-01
Supplement: d0gc02505d1.pdf [file d0gc02505d1.pdf]

*Electronic Supplementary Information*

**Non-catalytic oxidative depolymerization of lignin in perfluorodecalin to  
produce phenolic monomers**

Parinaz Hafezisefat,<sup>a</sup> Jake K. Lindstrom,<sup>a</sup> Robert C. Brown,<sup>\*a</sup> Long Qi<sup>\*b</sup>

<sup>a</sup> Department of Mechanical Engineering, Iowa State University, Ames, Iowa, USA, 50011

<sup>b</sup> U.S. DOE Ames Laboratory, Iowa State University, Ames, Iowa, USA, 50011

## Physical properties of the evaluated solvents

**Table. S1** Physical properties of evaluated solvents.<sup>1</sup>

|                              | Perfluorodecalin | Acetonitrile | Ethyl acetate | Butanol | Methanol |
|------------------------------|------------------|--------------|---------------|---------|----------|
| Molecular weight (g/mol)     | 463              | 41.05        | 88.11         | 74.12   | 32.04    |
| Density (g/ml)               | 1.93             | 0.786        | 0.9           | 0.810   | 0.79     |
| Boiling point(°C)            | 140              | 81.6         | 77            | 117.6   | 64.7     |
| Vapor pressure (bar @ 20 °C) | 0.008            | 0.12         | 0.126         | 0.0067  | 0.169    |

## Hansen solubility parameters

**Table. S2** Hansen solubility parameters of oxygen<sup>2</sup>, perfluorodecalin<sup>3</sup> and organic solvents<sup>4</sup> and the solubility distance ( $R_a$ ) of oxygen and solvents<sup>4</sup>.

|            | Oxygen | Perfluorodecalin | Ethyl acetate | Benzene | Butanol | Acetonitrile | Methanol | Water |
|------------|--------|------------------|---------------|---------|---------|--------------|----------|-------|
| $\delta_D$ | 11.7   | 13.15            | 15.8          | 18.4    | 16      | 15.3         | 15.1     | 15.5  |
| $\delta_P$ | 0      | 0                | 5.3           | 0       | 5.7     | 18           | 12.3     | 16    |
| $\delta_H$ | 0      | 0                | 7.2           | 2       | 15.8    | 6.1          | 22.3     | 42    |
| $\delta_t$ | 11.7   | 13.15            | 18.15         | 18.5    | 23.2    | 24.4         | 29.6     | 47.86 |
| $R_a$      | -      | 2.9              | 12.1          | 13.5    | 18.87   | 20.3         | 26.35    | 45.86 |

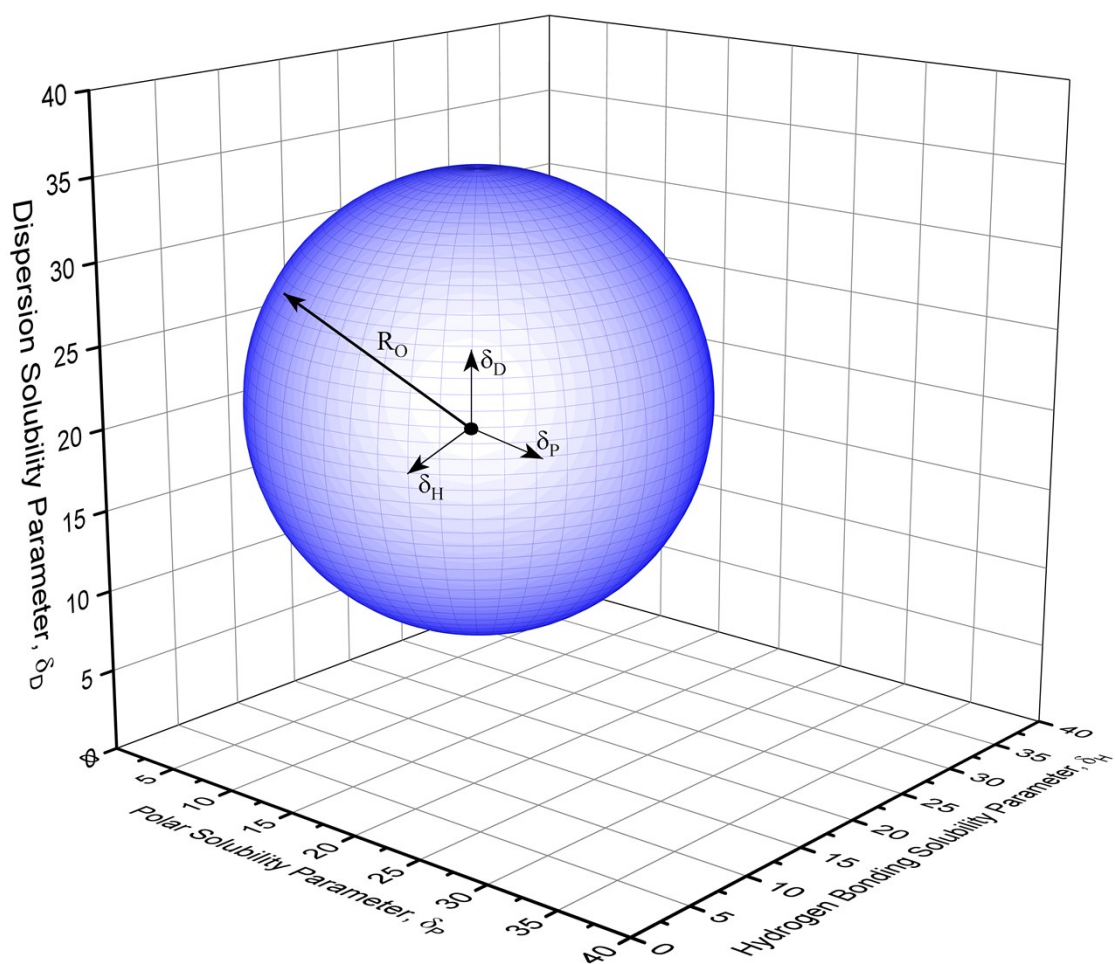

**Fig. S1** Hansen solubility sphere of lignin<sup>4</sup> ( $\delta_D = 21.9 \text{ MPa}^{0.5}$ ,  $\delta_P = 14.1 \text{ MPa}^{0.5}$ ,  $\delta_H = 16.9 \text{ MPa}^{0.5}$ ,  $R_O = 13.7 \text{ MPa}^{0.5}$ )

## Gas chromatograms of lignin oils produced from oxidation in various solvents

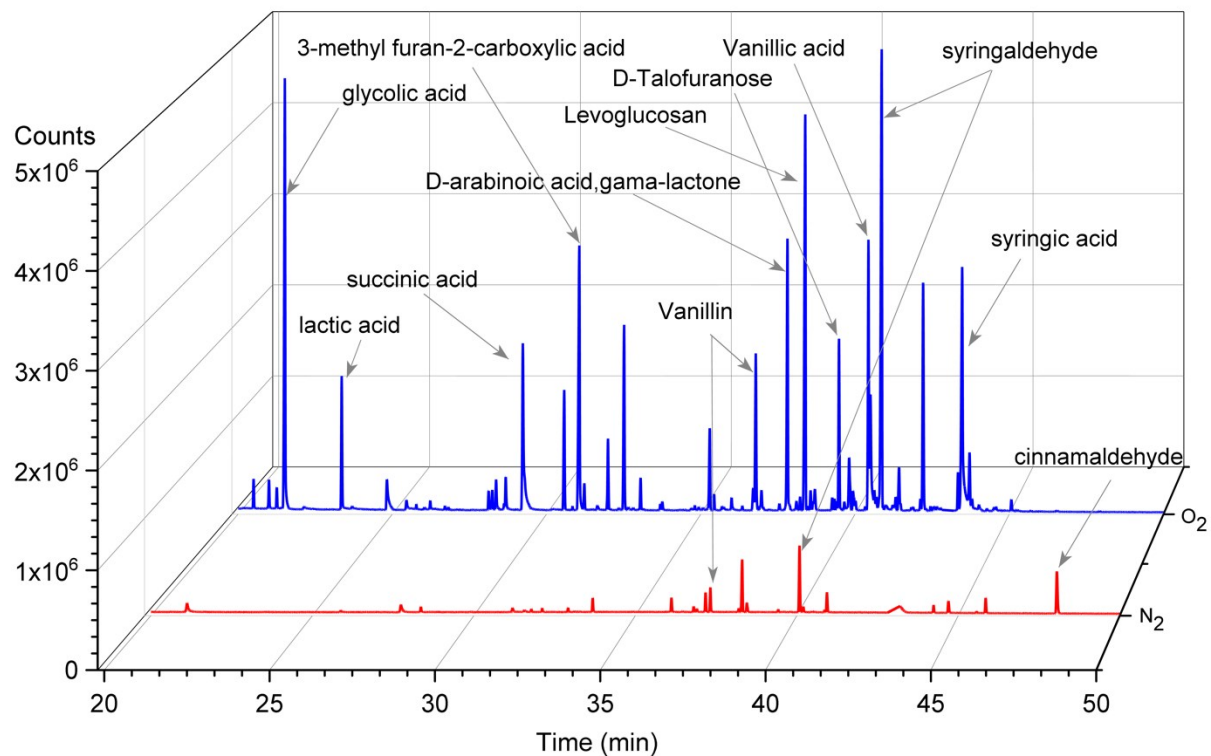

**Fig. S2** Gas chromatograms of acetone-extracted lignin oil from reaction in perfluorodecalin under  $O_2$  and  $N_2$  at 250 °C and, 300 psi pressure for 10 min. Deep oxidation of lignin and carbohydrates produced acids like lactic acid, glycolic acid, and succinic acid.

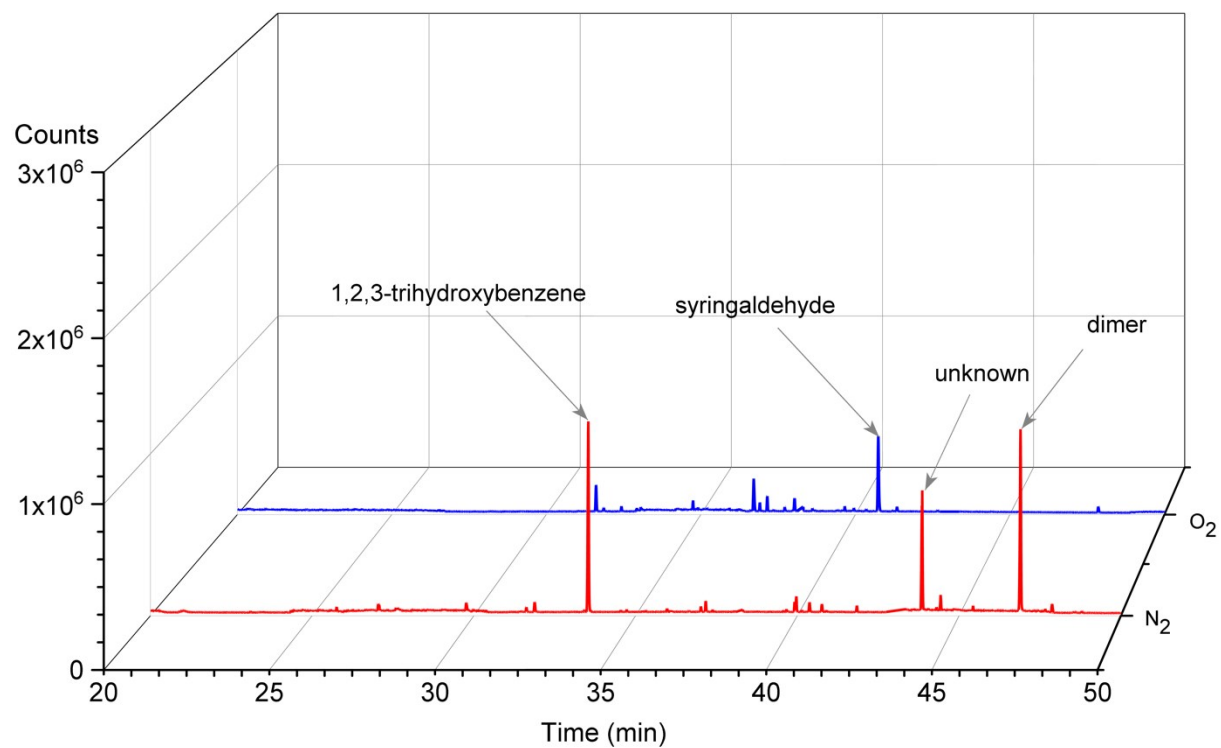

**Fig. S3** Gas chromatograms of acetone-extracted lignin oil from reaction in acetonitrile under O<sub>2</sub> and N<sub>2</sub> at 250 °C and 300 psi pressure for 10 min.

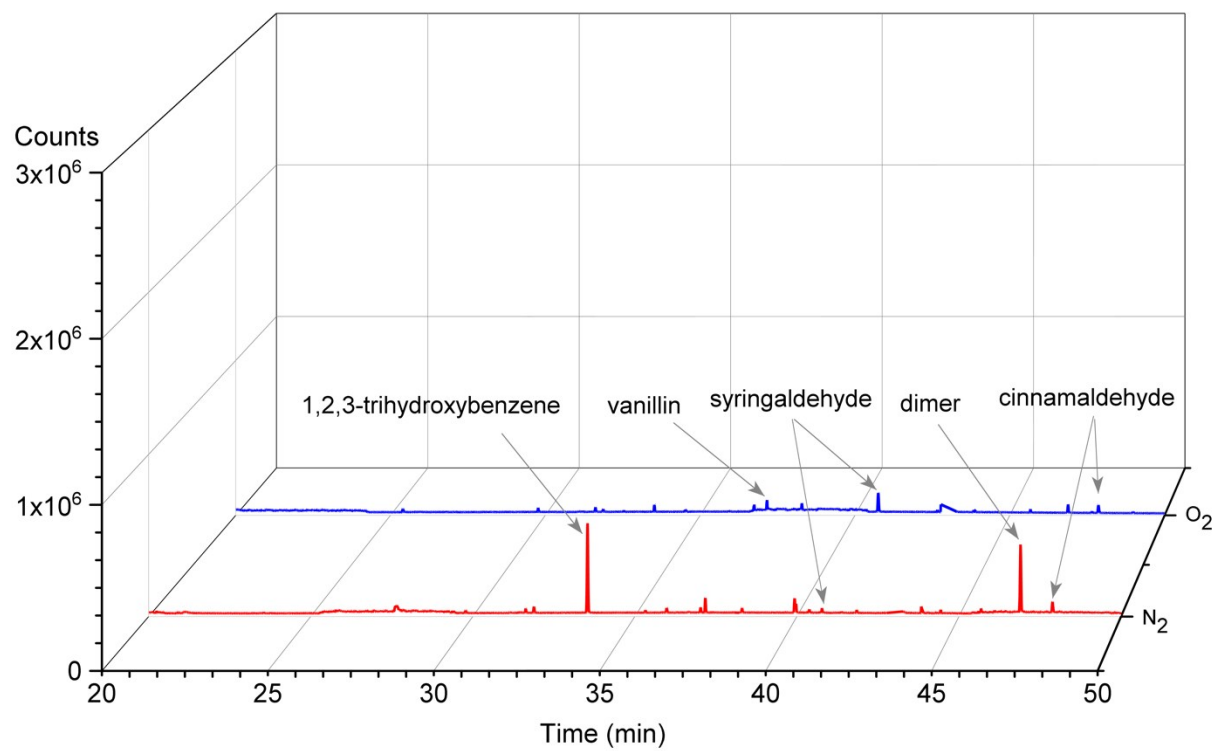

**Fig. S4** Gas chromatograms of acetone-extracted lignin oil from reaction in ethyl acetate under  $O_2$  and  $N_2$  at 250 °C and, 300 psi pressure for 10 min.

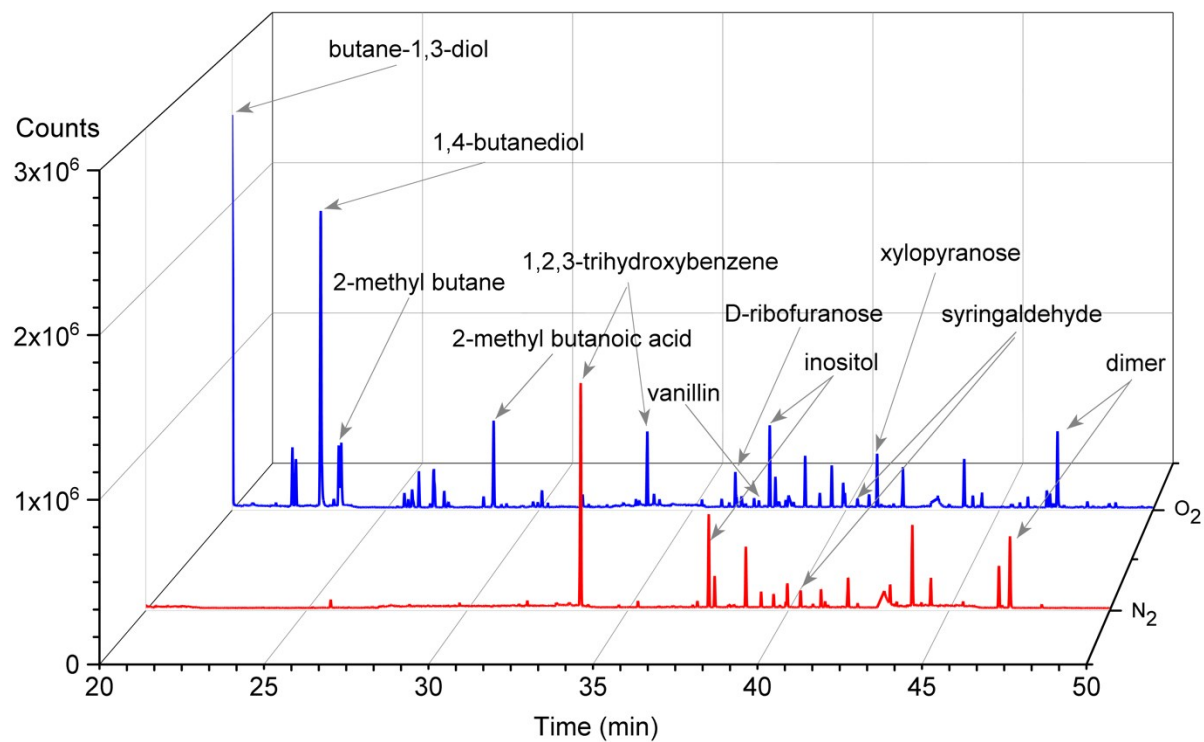

**Fig. S5** Gas chromatograms of acetone-extracted lignin oil from reaction in butanol under O<sub>2</sub> and N<sub>2</sub> at 250 °C and, 300 psi pressure for 10 min.

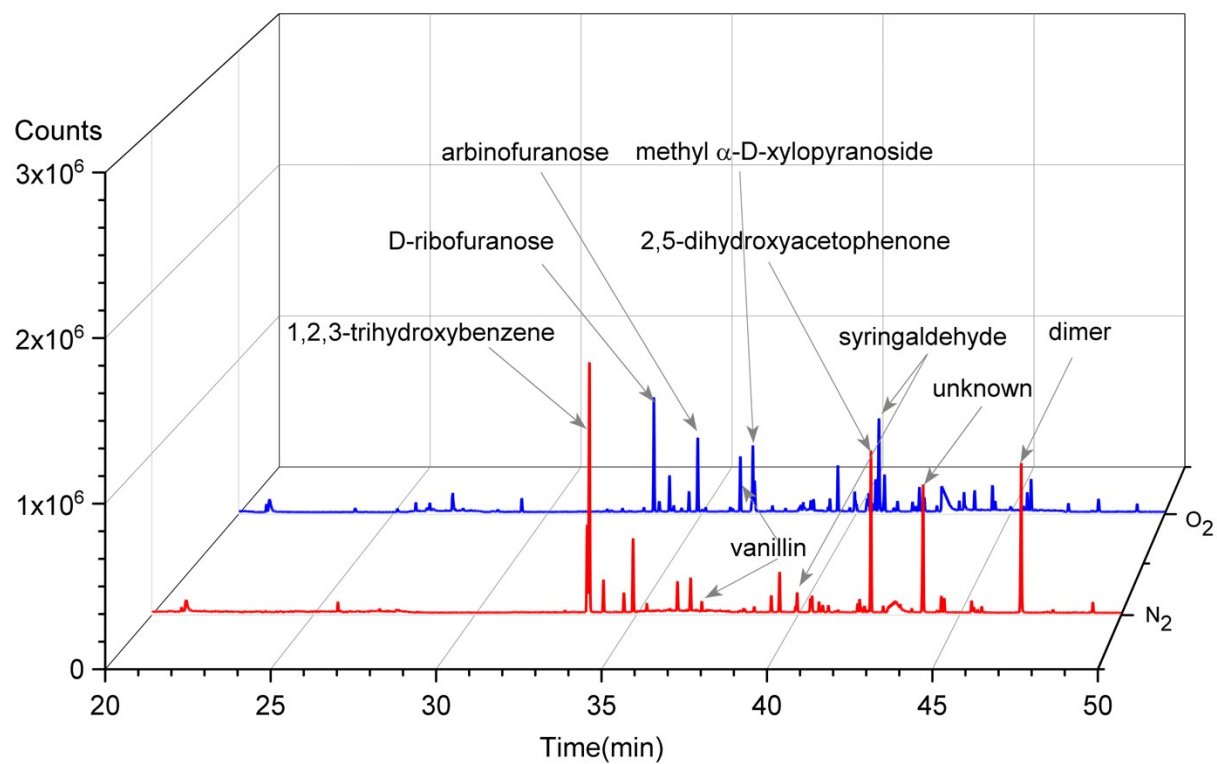

**Fig. S6** Gas chromatograms of acetone-extracted lignin oil from reaction in methanol under  $O_2$  and  $N_2$  at 250 °C and 300 psi pressure for 10 min.



## GPC results

**Table. S3** Number averaged molecular weight ( $M_n$ ), weight averaged molecular weight ( $M_w$ ) and polydispersity (PD) of reaction under  $O_2$  or  $N_2$ . Reaction conditions: 100 mg red oak, 5 ml solvent, 250 °C, 300 psi pressure for 10 min.

| solvent       | Gas   | $M_n$ | $M_w$ | PD   |
|---------------|-------|-------|-------|------|
| Acetonitrile  | $O_2$ | 440   | 599   | 1.36 |
|               | $N_2$ | 497   | 783   | 1.58 |
| Ethyl acetate | $O_2$ | 460   | 600   | 1.3  |
|               | $N_2$ | 456   | 583   | 1.28 |
| Butanol       | $O_2$ | 597   | 1385  | 2.32 |
|               | $N_2$ | 624   | 1434  | 2.3  |
| Methanol      | $O_2$ | 565   | 1356  | 2.4  |
|               | $N_2$ | 668   | 1746  | 2.61 |

## Proximate and ultimate analysis

**Table. S4** Proximate and ultimate analysis of red oak

| Proximate analysis (% wt) |              |        |          | Ultimate analysis (% wt) |       |      |      |       |
|---------------------------|--------------|--------|----------|--------------------------|-------|------|------|-------|
| Volatile                  | Fixed carbon | Ash    | Moisture | C                        | H     | N    | S    | O     |
| 80.1535                   | 15.8484      | 0.5757 | 3.4255   | 46.39                    | 4.988 | 0.25 | .052 | 48.32 |

## Liquid-liquid separation from perfluorodecalin

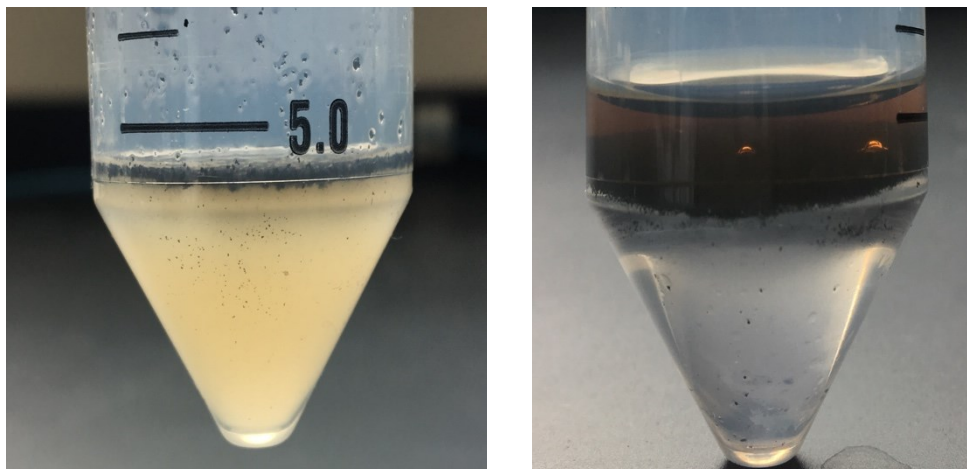

**Fig. S7** Phase separation of oxidation products and residual solid biomass from perfluorodecalin before (left) and after (right) addition of acetone.

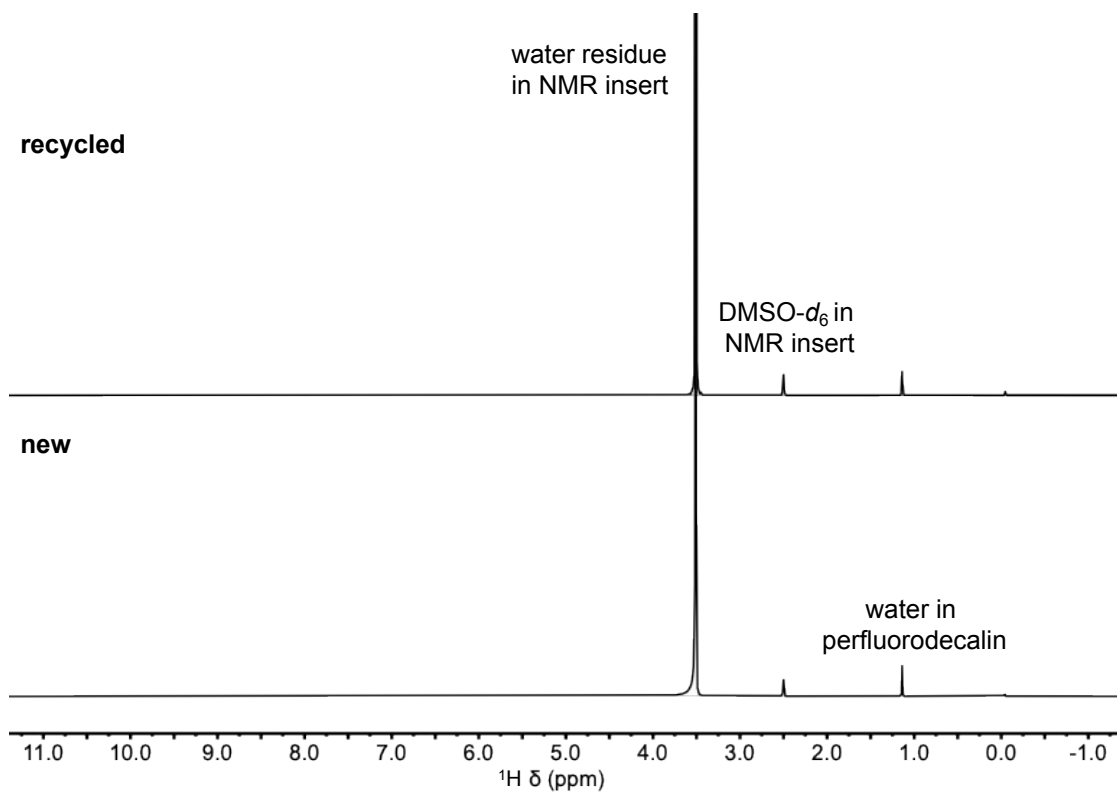

**Fig. S8**  $^1\text{H}$  NMR spectra of new and recycled perfluorodecalin. The spectra were collected with 4 scans and 1 s as the relaxation delay.

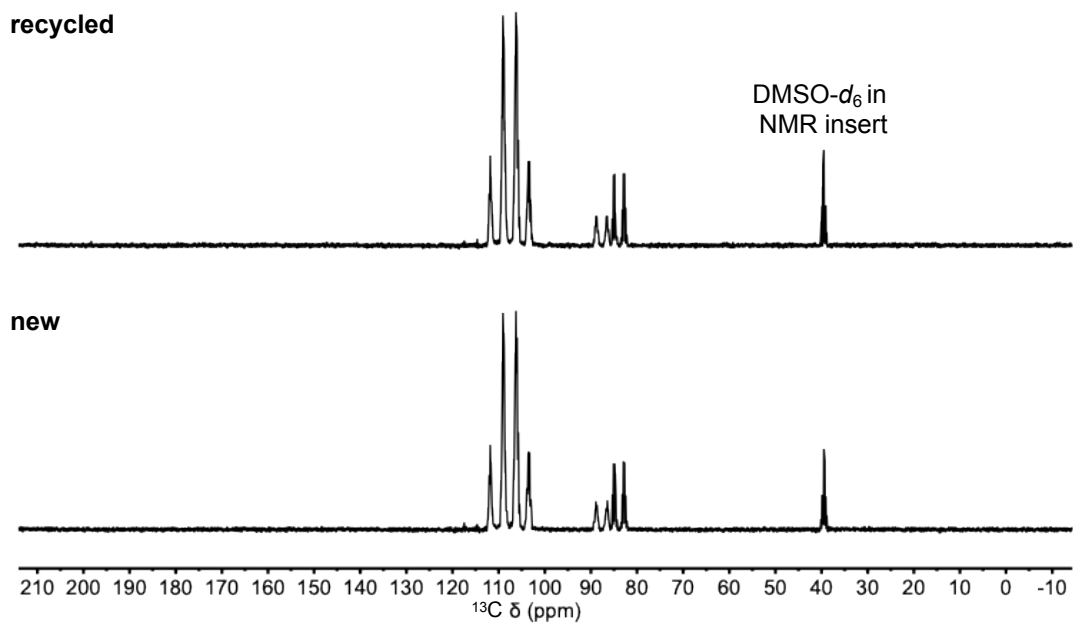

**Fig. S9**  $^{13}\text{C}$  NMR spectra of new and recycled perfluorodecalin. The spectra were collected with 256 scans and 2 s as the relaxation delay.

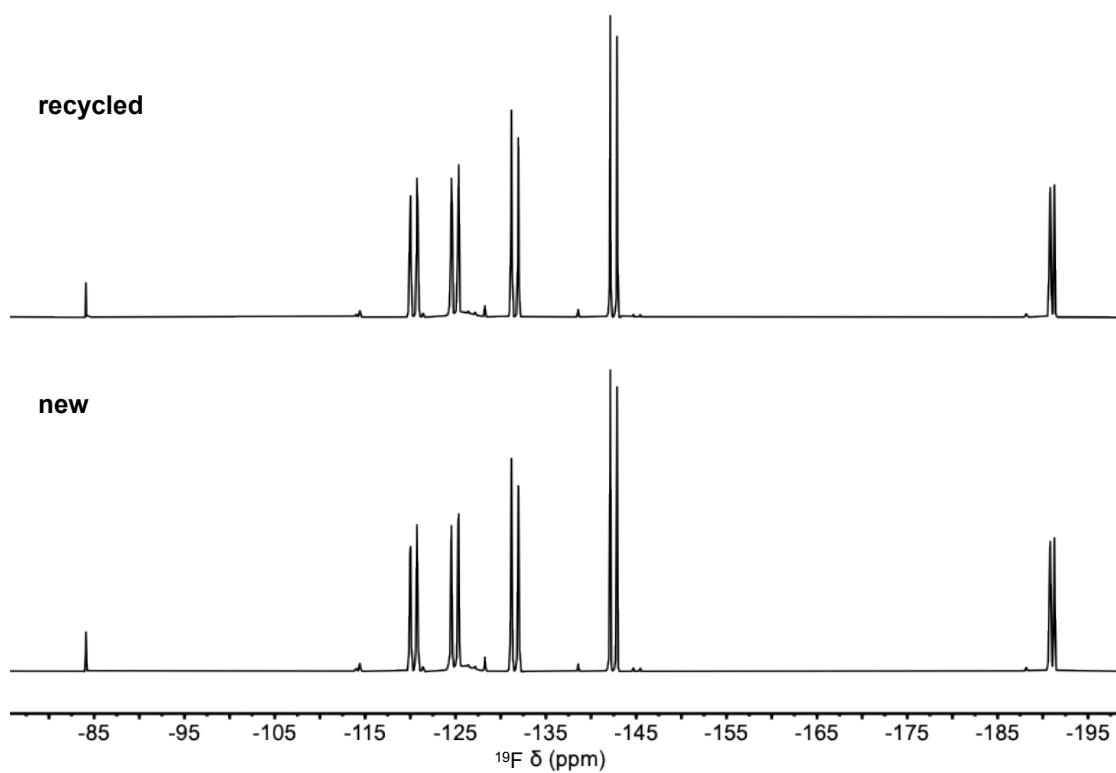

**Fig. S10**  $^{19}\text{F}$  NMR spectra of new and recycled perfluorodecalin. The spectra were collected with 4 scans and 10 s as the relaxation delay.

The  $^{19}\text{F}$  NMR spectra before and after recycling are identical to the literature results<sup>5,6</sup>, indicating the decomposition does not occur under our reaction conditions.

## Supplementary References

- 1 D. R. Lide, Ed., *CRC handbook of chemistry and physics*, CRC press.
- 2 D. . Lawson, *Appl. Energy*, 1980, **6**, 241–255.
- 3 A. Wypych and G. Wypych, *Databook of solvents*, .
- 4 C. M. Hansen, *Hansen solubility parameters: a user's handbook.*, CRC press, 2002.
- 5 V. A. Ivlev, G. A. Kalabin and I. A. Maslennikov, *Pharm. Chem. J.*, 2016, **50**, 270–274.
- 6 L. S. Chin, M. Lim, T. T. Hung, C. P. Marquis and R. Amal, *RSC Adv.*, 2014, **4**, 13052–13060.
